# Supplementary material for: Tumor-suppressive functions of 15-Lipoxygenase-2 and RB1CC1 in prostate cancer
Source: PubMed Central journal article supplement — Cell Cycle. 2014 Apr 14;13(11):1798–810. doi: 10.4161/cc.28757 (PMC4111726; doi:10.4161/cc.28757), 2014-04-14

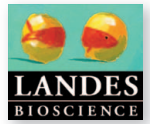

## **Supplemental Material to:**

**Mahipal V Suraneni, John R Moore, Dingxiao Zhang,  
Mark Badeaux, Marc D Macaluso, John DiGiovanni,  
Donna Kusewitt, and Dean G Tang**

**Tumor-suppressive functions of 15-Lipoxygenase-2 and  
RB1CC1 in prostate cancer**

**Cell Cycle 2014; 13(11)**

**<http://dx.doi.org/10.4161/cc.28757>**

**<http://www.landesbioscience.com/journals/cc/article/28757>**

## Supplementary Figure legend:

### Figure S1. Prostatic hyperplasia in 15-LOX2 Tg mice does not progress to PIN.

- (A). Representative whole-mount (WM) HE images of 12-week ventral prostates (VP) of the genotypes indicated.
- (B). Quantification of hyperplasia using a point-intersect method. A positive point consisted of the intersection of two major grid lines overlying epithelium. Bars represent mean  $\pm$  S.D (n = 12 for each genotype).
- (C). Representative HE images of 12-week VPs of p53<sup>-/-</sup> and 15-LOX2;p53<sup>-/-</sup> mice (n = 5 for each genotype).

### Figure S2. IHC of 15-LOX2, Myc, and $\alpha$ -SMA in 6-month old Hi-Myc and Myc;LOX prostates.

Shown are representative WM HE images from one 6.4 month-old Hi-Myc (top; a-d) and one 6.7 month-old Myc;LOX dTg (bottom; g-h) prostates. The orientation of the prostate is shown in the lower left panel (U, urethra; DP, dorsal prostate; LP, lateral prostate; VP, ventral prostate). Note the prominent adenocarcinomas in the Hi-Myc LP (a) compared to much less prominent lesions in the Myc;LOX LP (e). Serial WM sections were used in IHC of 15-LOX2, Myc, and  $\alpha$ -SMA. Note that 15-LOX2 was strongly expressed in the VP and LP of the dTg prostates (f).  $\alpha$ -SMA was lacking in the Hi-Myc LP tumors (d) but still observed in some Myc;LOX LP glands (h).

### Figure S3. IHC of 15-LOX2, Myc, and $\alpha$ -SMA in 6-month old Hi-Myc and Myc;LOX prostates.

Shown are representative IHC images of 15-LOX2, Myc, and  $\alpha$ -SMA from one 6.4 month-old Hi-Myc and one 7 month-old Myc;LOX dTg prostates.  $\alpha$ -SMA.  $\alpha$ -SMA was lacking in the Hi-Myc tumor but still observed in the Myc;LOX LP glands (below).

### Figure S4. 15-LOX2, Myc, and RB1CC1 in normal prostatic tissues and HPCa samples.

Shown are high-magnification IHC images (400x) of 15-LOX2, Myc, and RB1CC1 in the benign/normal (N) and tumor (T) regions of two HPCa samples (i.e., HPC11 and HPCa16) presented in Fig. 5A-B. Note the reciprocal expression patterns between 15-LOX2 and Myc. In contrast to 15-LOX2, which is lost HPCaT, RB1CC1 protein is not lost but actually overexpressed in HPCaT.

**Figure S5. Overexpression of RB1CC1 causes NHP cell growth arrest, senescence, and/or apoptosis.**

Primary strains of NHP cells of the equal numbers as indicated at different passages (P) were transfected with either the empty vector (p3xFLAG-CVM10) or the RB1CC1-encoding expression vector. Images were taken 72 h after transfection. Note significantly reduced cell numbers and apoptotic and senescent morphologies in RB1CC1-overexpressing cultures. Original magnifications, x200.

Table S1 . Primary antibodies used in the current study

| <b>Antibody</b>   | <b>Host</b> | <b>Clonality</b> | <b>Company</b>   | <b>Catalog #</b> |
|-------------------|-------------|------------------|------------------|------------------|
| $\alpha$ -SMA     | mouse       | monoclonal       | Sigma            | A2547            |
| $\beta$ -Actin    | mouse       | monoclonal       | Sigma            | A5316            |
| c-Myc             | rabbit      | monoclonal       | Epitomics        | 1472-1           |
| Lamin             | goat        | polyclonal       | Santa Cruz       | sc-6214          |
| Phosphorylated-Rb | goat        | polyclonal       | Santa Cruz       | sc-12901         |
| pRb               | rabbit      | polyclonal       | Santa Cruz       | sc-50            |
| p27               | mouse       | monoclonal       | BD               | 554069           |
| p53               | rabbit      | polyclonal       | Cell Signaling   | 9287             |
| RB1CC1            | rabbit      | polyclonal       | Novus Biological | NBP1-30010       |
| RB1CC1            | rabbit      | polyclonal       | Sigma            | SAB4200135       |
| 15LOX-2           | rabbit      | polyclonal       | Oxford Biomed    | LX 25            |

**Table S2. Real-time PCR primers used in gene expression studies and PCR primers used for genotyping**

| Gene                               | Forward Primer (5'--3')           | Reverse Primer (5'--3')     | Mouse/Human |
|------------------------------------|-----------------------------------|-----------------------------|-------------|
| C-Fos                              | CTCCAGTGCCAACTTCATTCCCAC          | GCAGCCATCTTATTCCTTTCCCTTCG  | human       |
| C-Jun                              | AACGACCTTCTATGACGATGCCCT C        | CCCGTTGCTGGACTGGATTATCAG    | human       |
| RB1                                | CATGCTGTTCAAGGAGACATTCAAACG       | ACACGGTCGCTGTTACATACCATCTG  | human       |
| RB1CC1                             | TCACCAGTAATGCCACTCAGTTGCC         | TTGGATTTGTGTCCGTCCTCCAGC    | mouse       |
| <b>Primers used for genotyping</b> |                                   |                             |             |
|                                    | Forward Primer (5'--3')           | Reverse Primer (5'--3')     |             |
| β-Casein                           | GATGTGCTCCAGGCTAAAGTT             | AGAAACGGAATGTTGTGGAGT       |             |
| β-Globin                           | GTGTTGTTTAGAATGGGAAGATGT          | TAAAGAGAAAGGCAGGATGATGA     |             |
| C-Myc                              | CAATGTCTGTGTACAACCTGCCAACTGGGATGC | TTACGCACAAGAGTTCCGTAGCTGTTC |             |
| P-53 WT                            | GTGTTTCATTAGTTCCCCACCTTGAC        | AGAGCAAGAATAAGTCAGAAGCCG    |             |
| P-53-NULL                          | TTTACGGAGCCCTGGCGCTCGATGT         | GTGGGAGGGACAAAAGTTCGAGGCC   |             |

**A**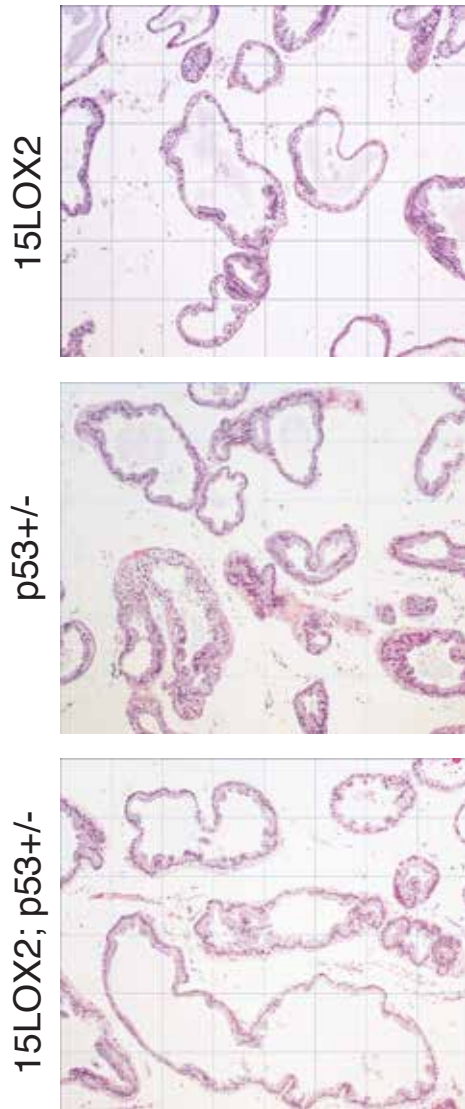**B**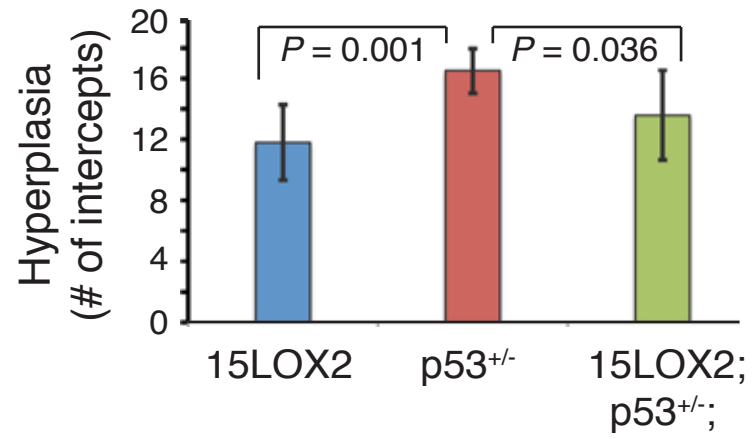**C**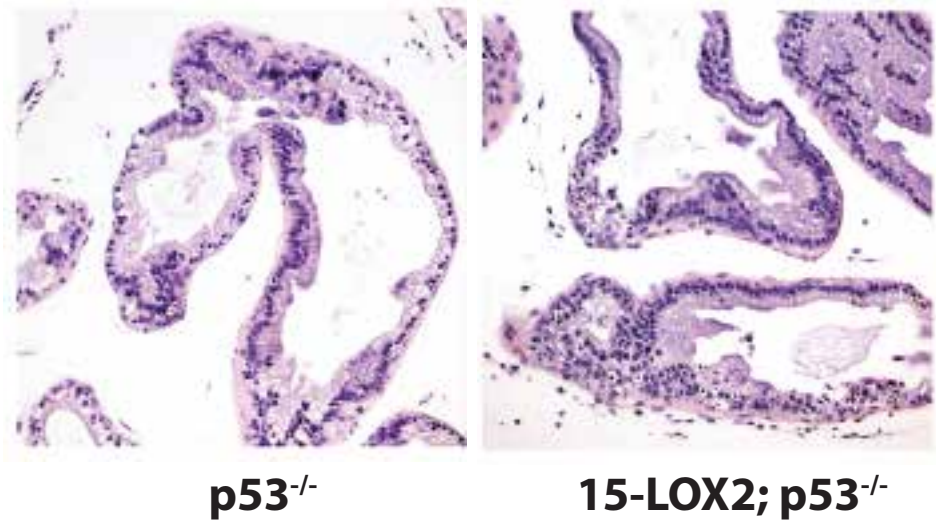

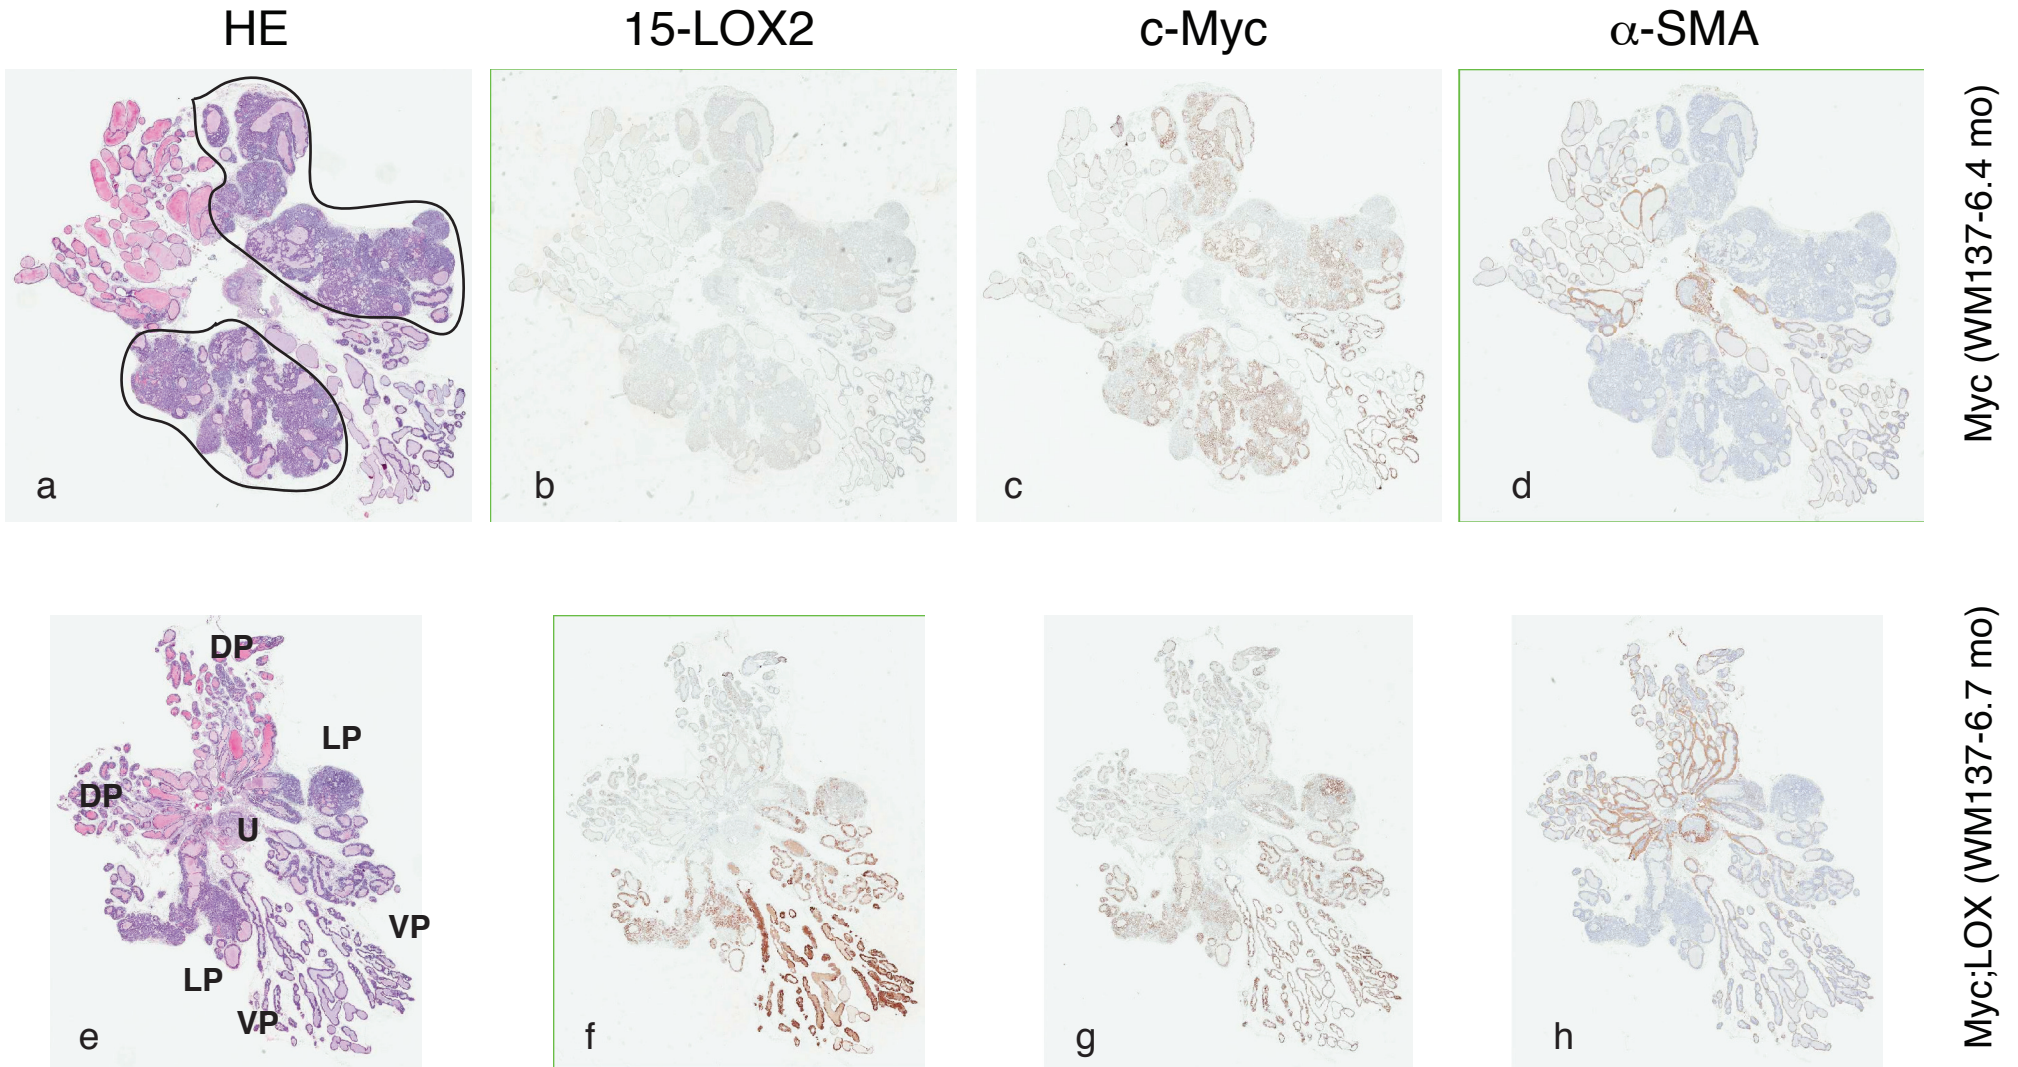



15-LOX2

Myc

$\alpha$ -SMA

100x

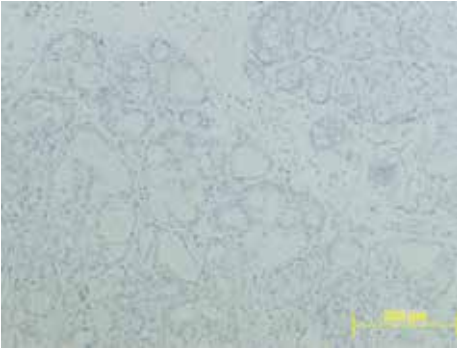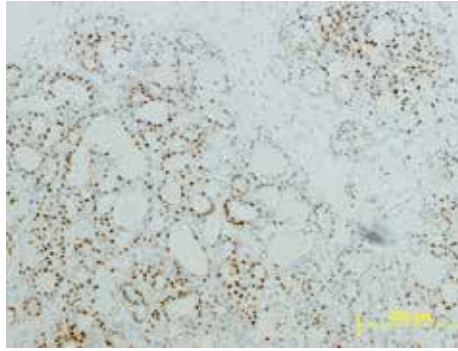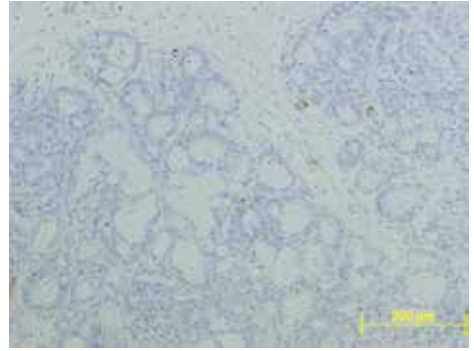

400x

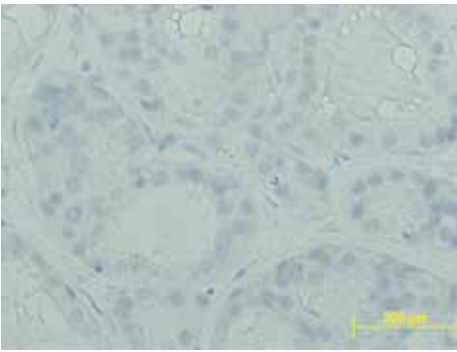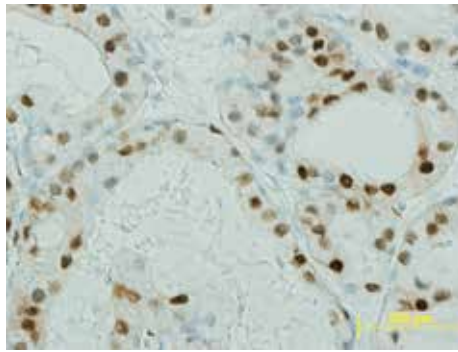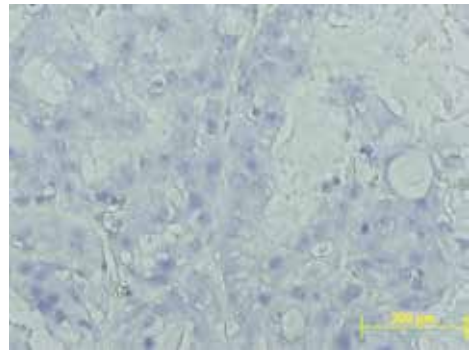

Myc (WM24-6.4 mo)

100x

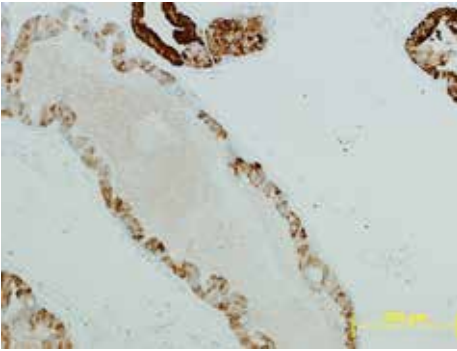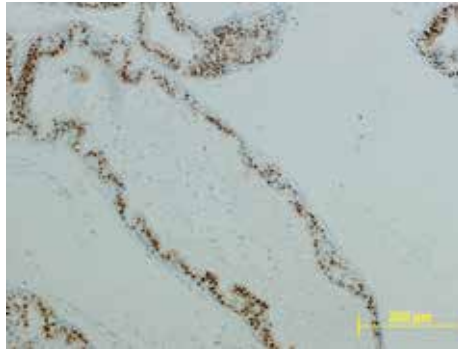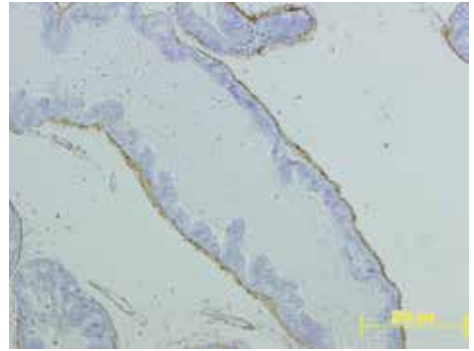

400x

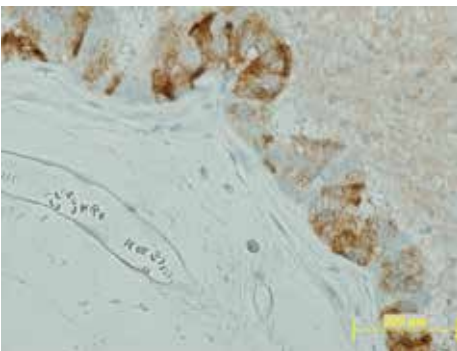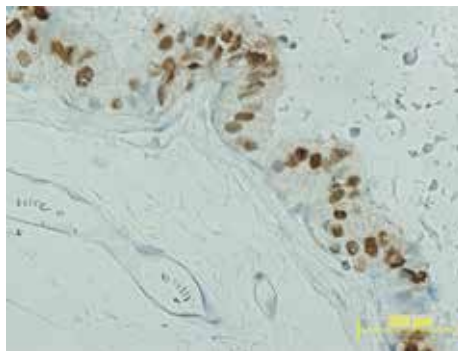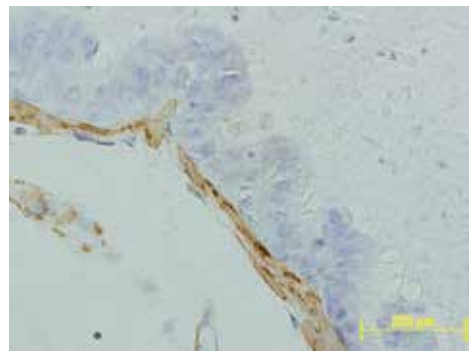

Myc;LOX (WM128-7 mo)



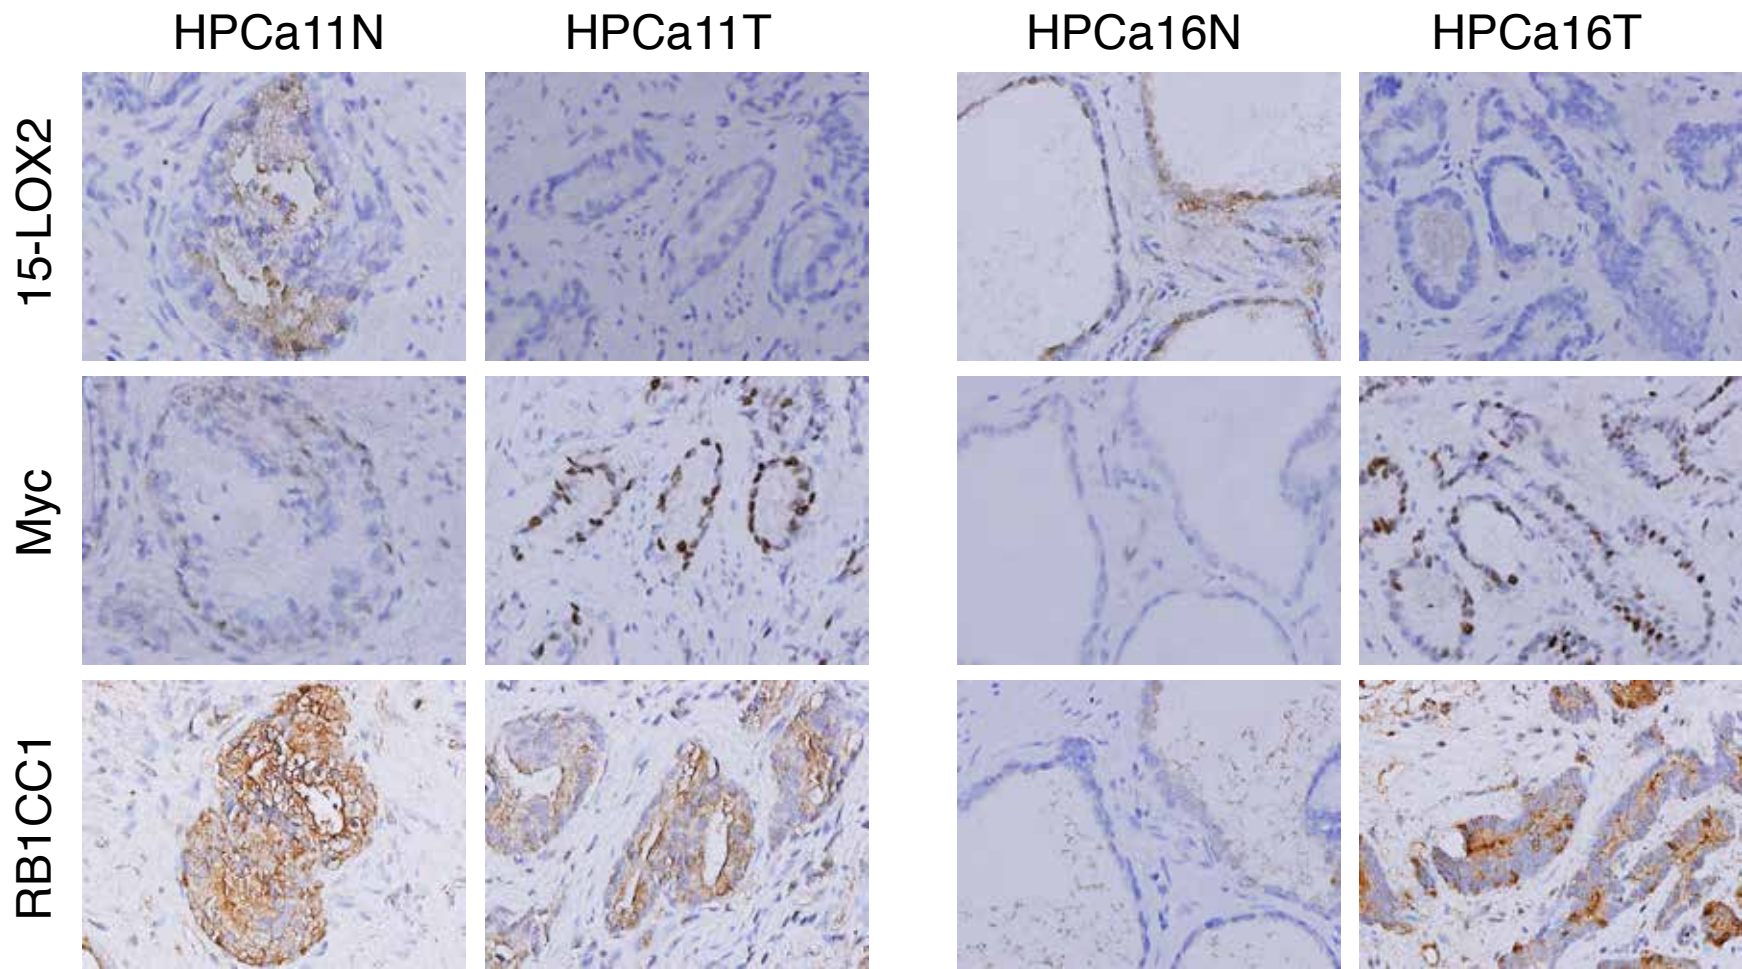

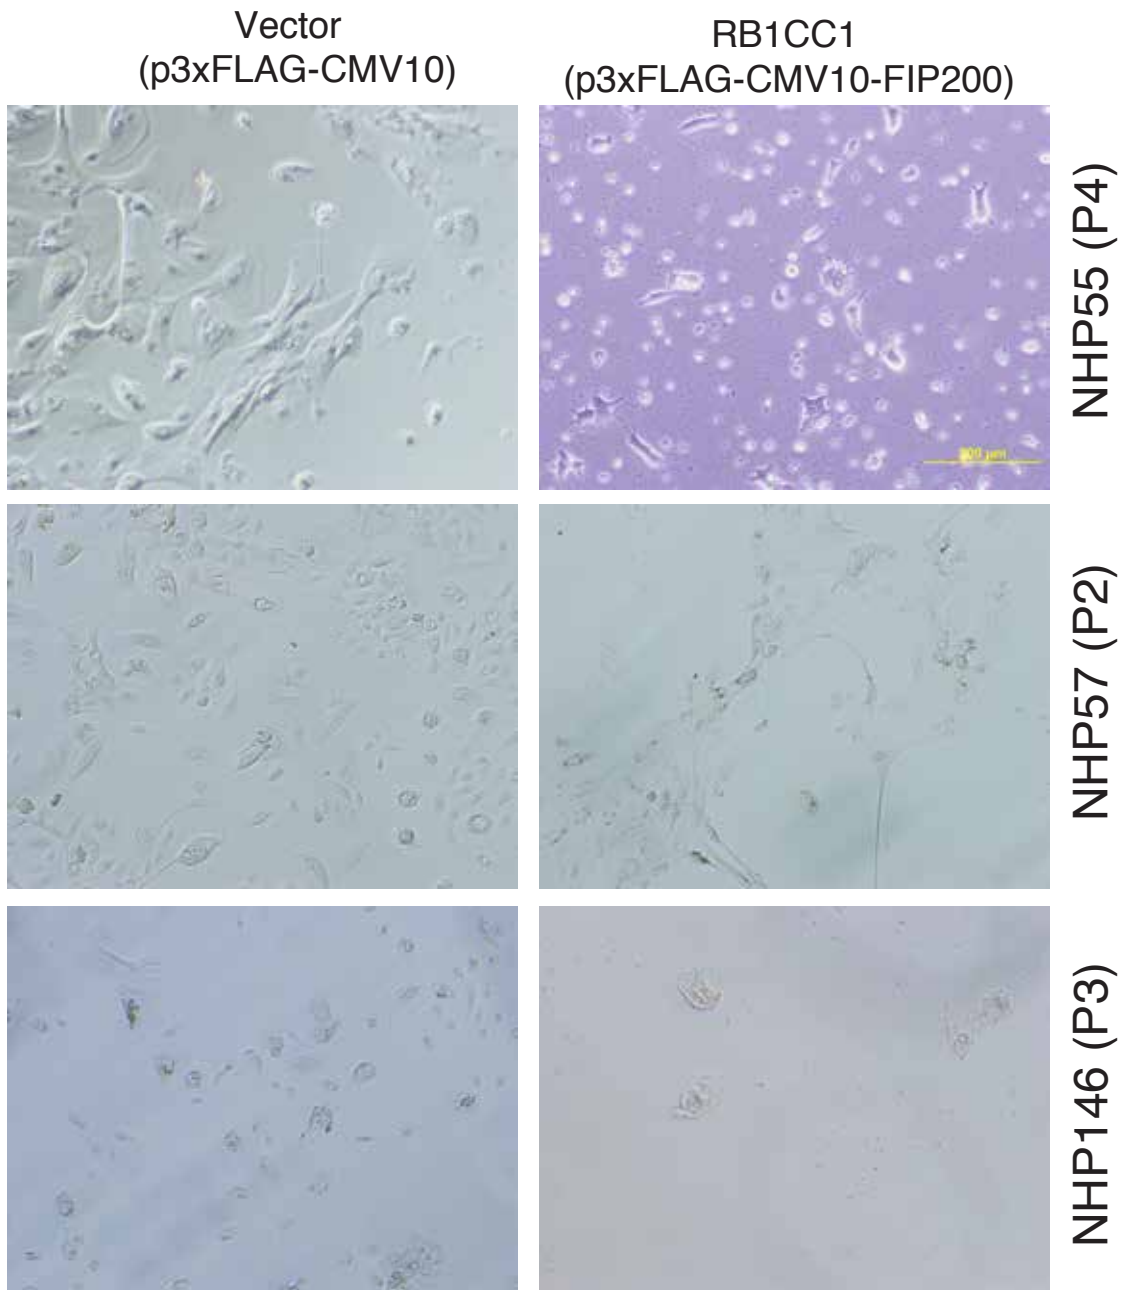

Supplement: cc-13-1798-s01.pdf [file cc-13-1798-s01.pdf]
